# Supplementary material
Source: PubMed Central journal article supplement (PMC4303641)

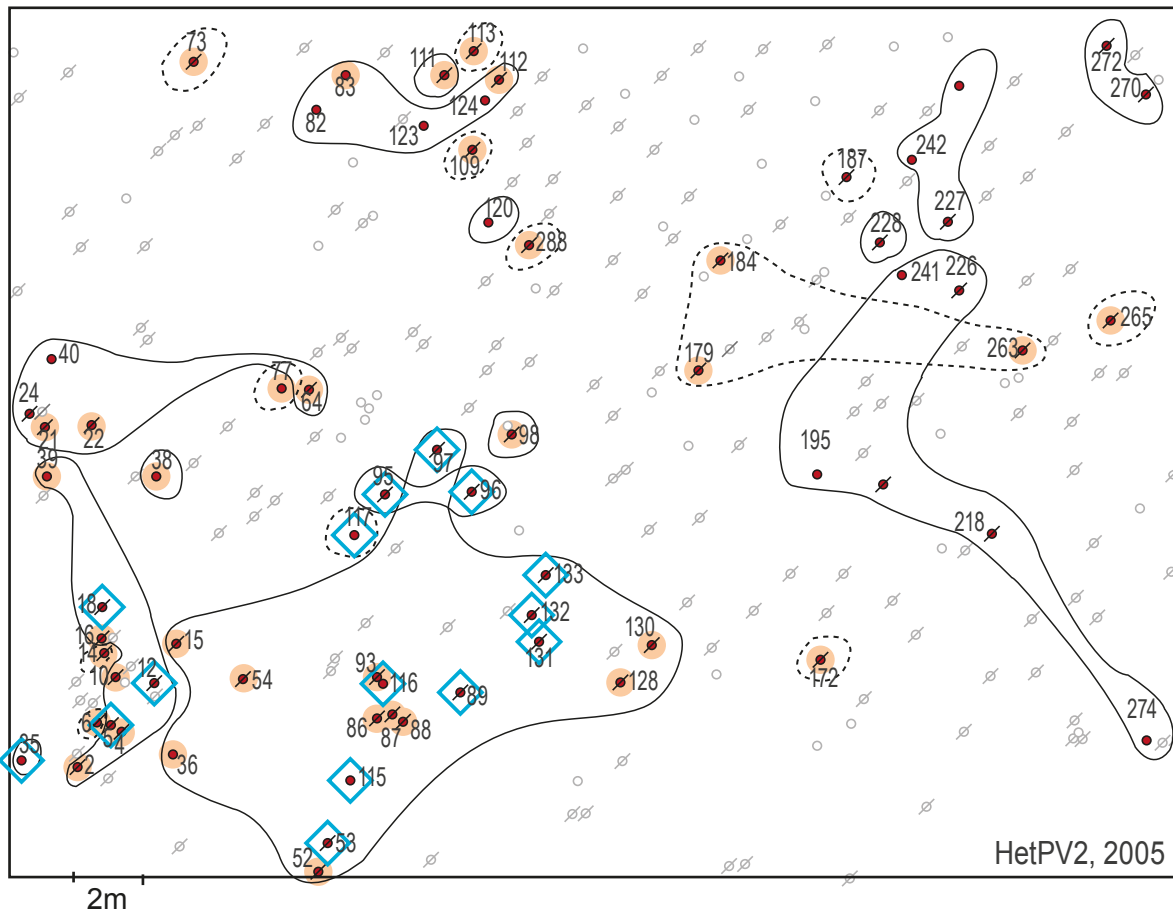

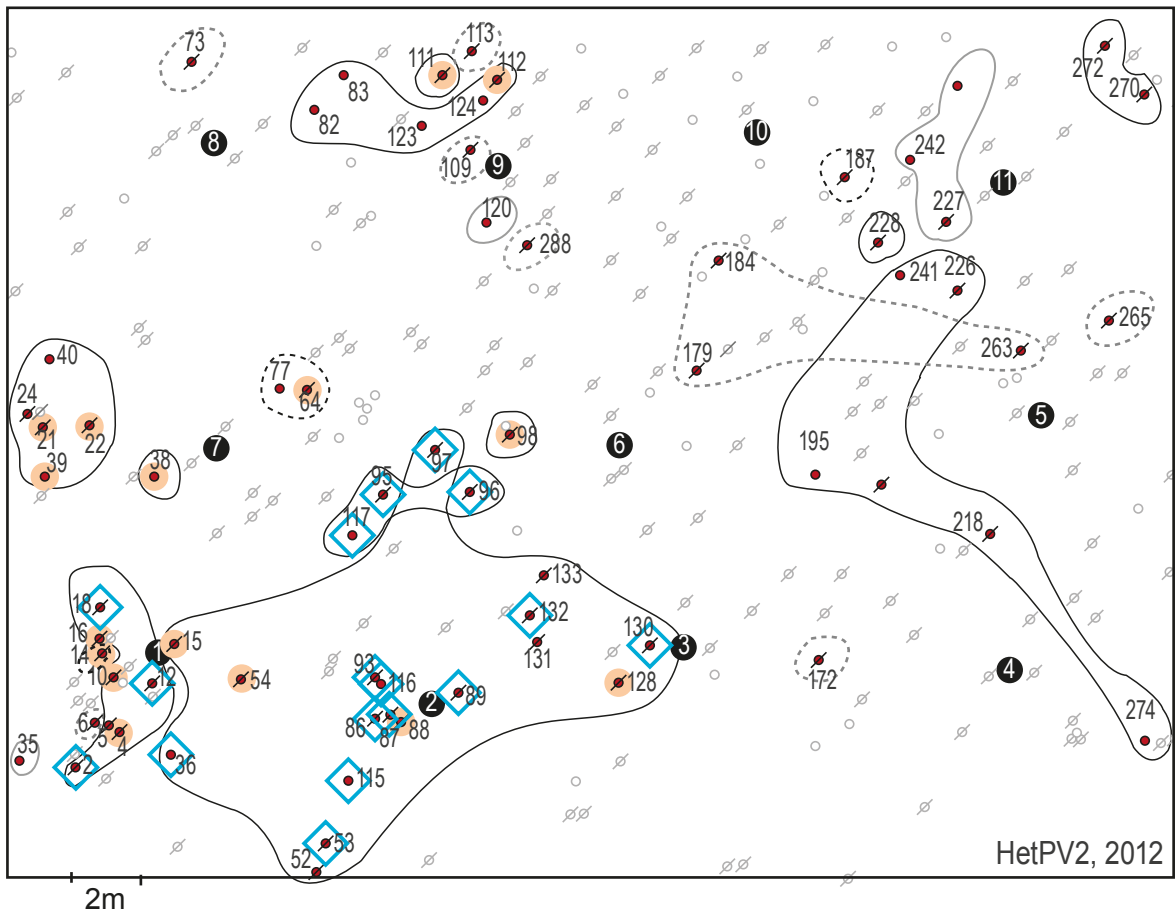

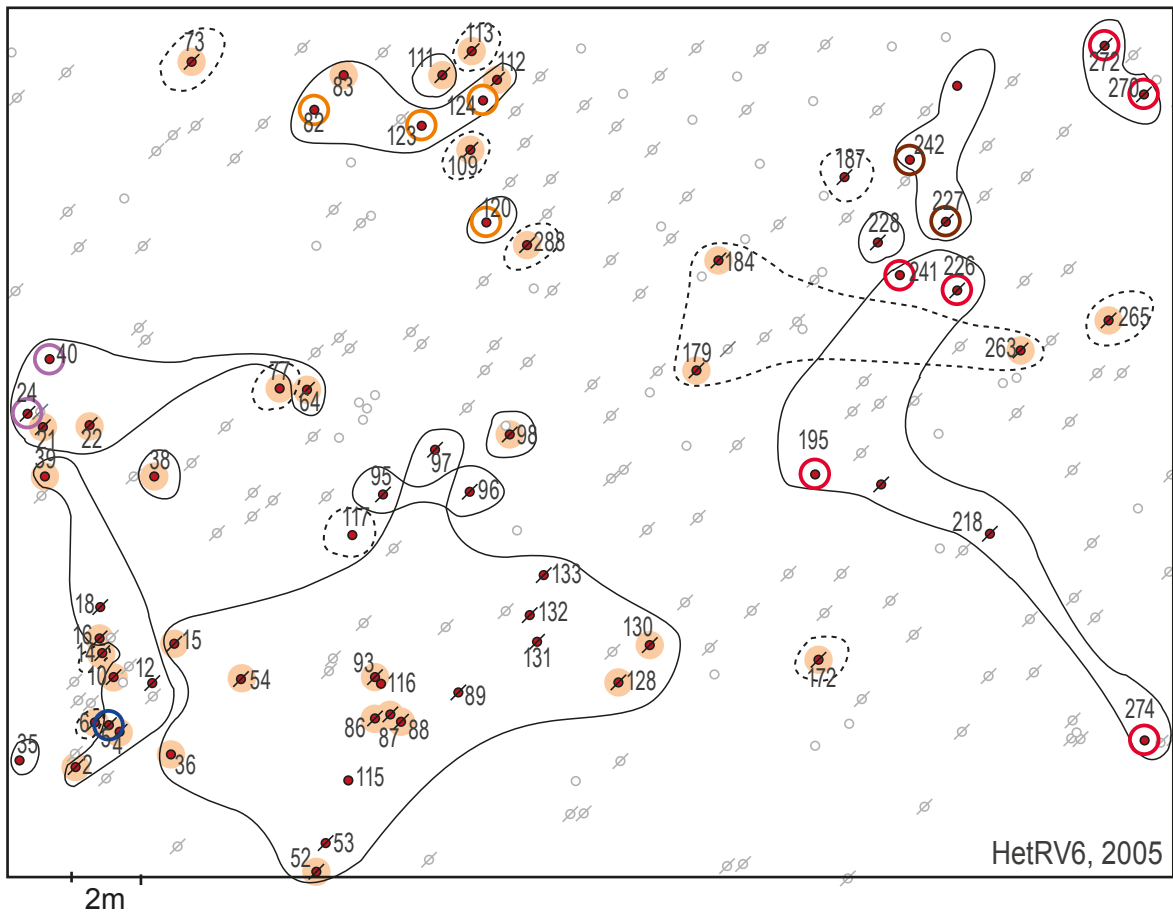

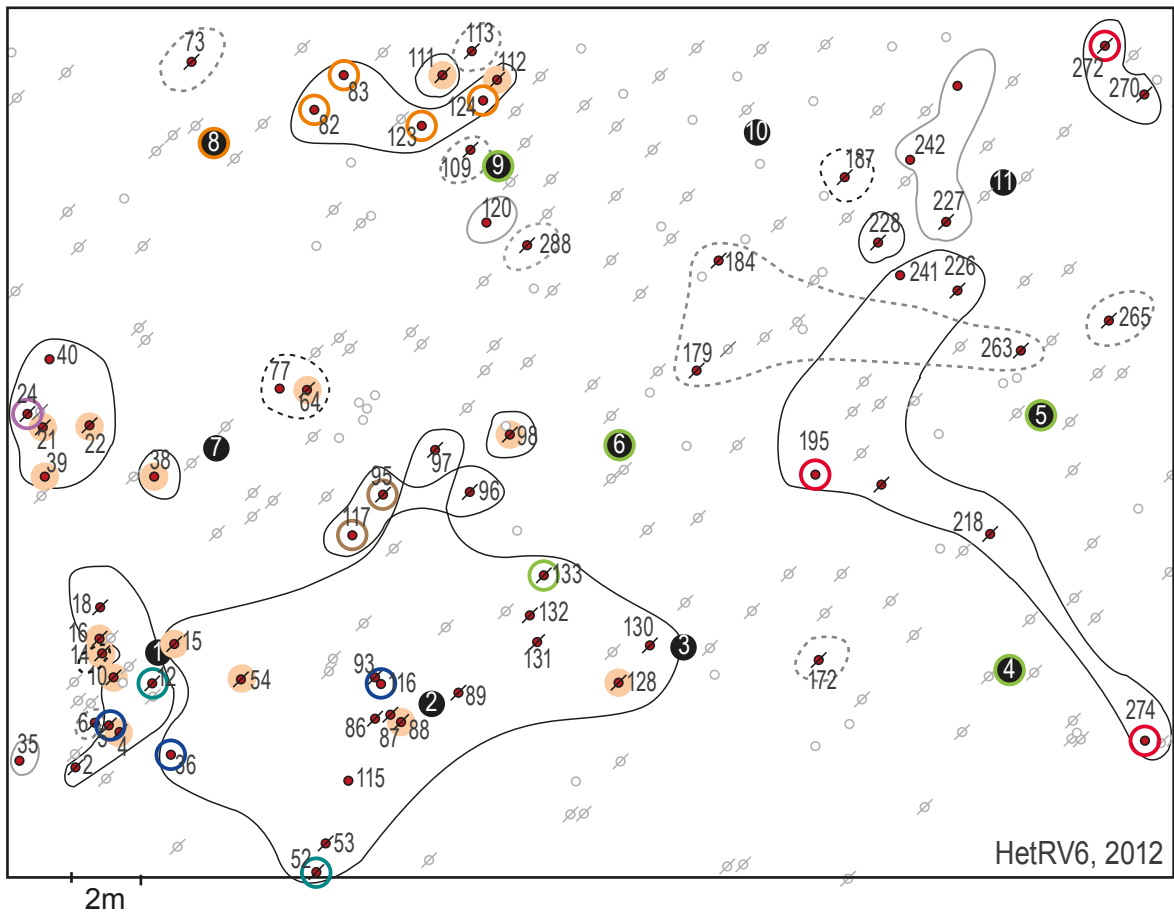

HetRV6, 2012

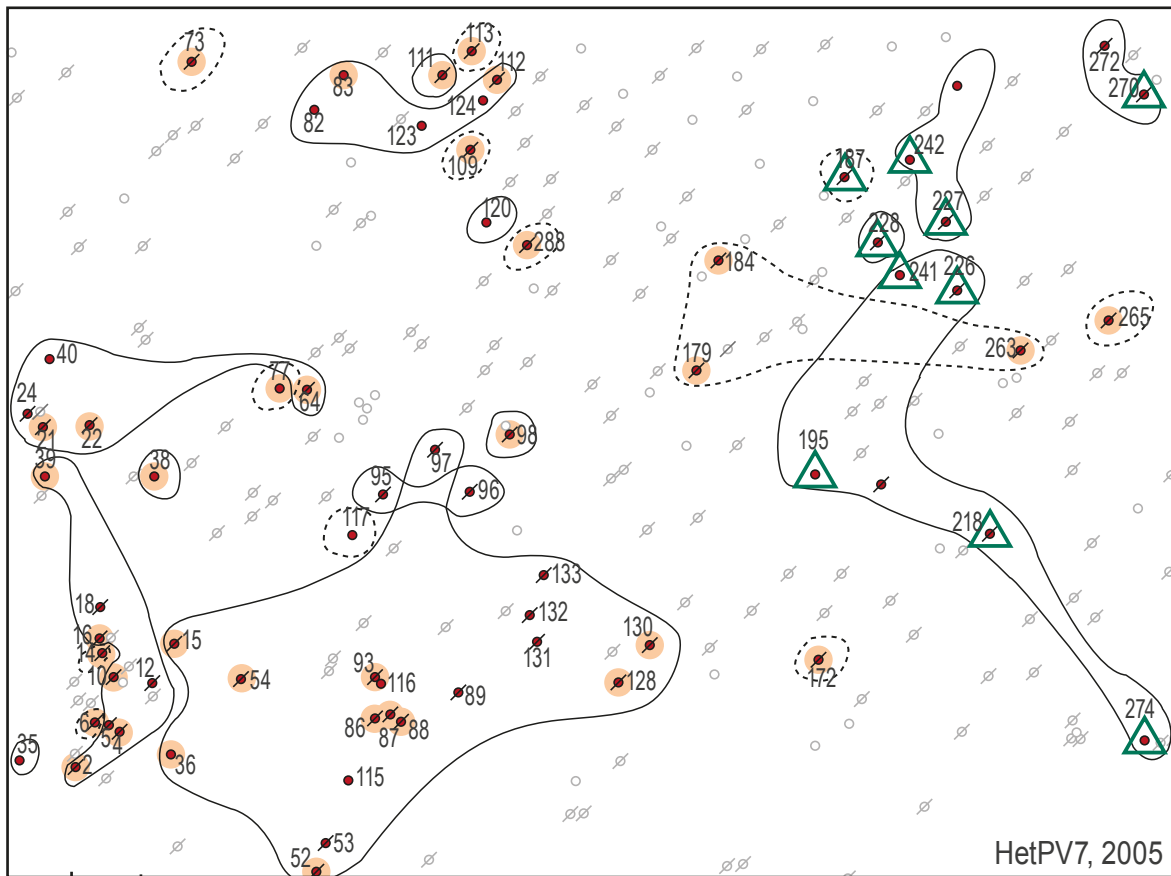

HetPV7, 2005

2m

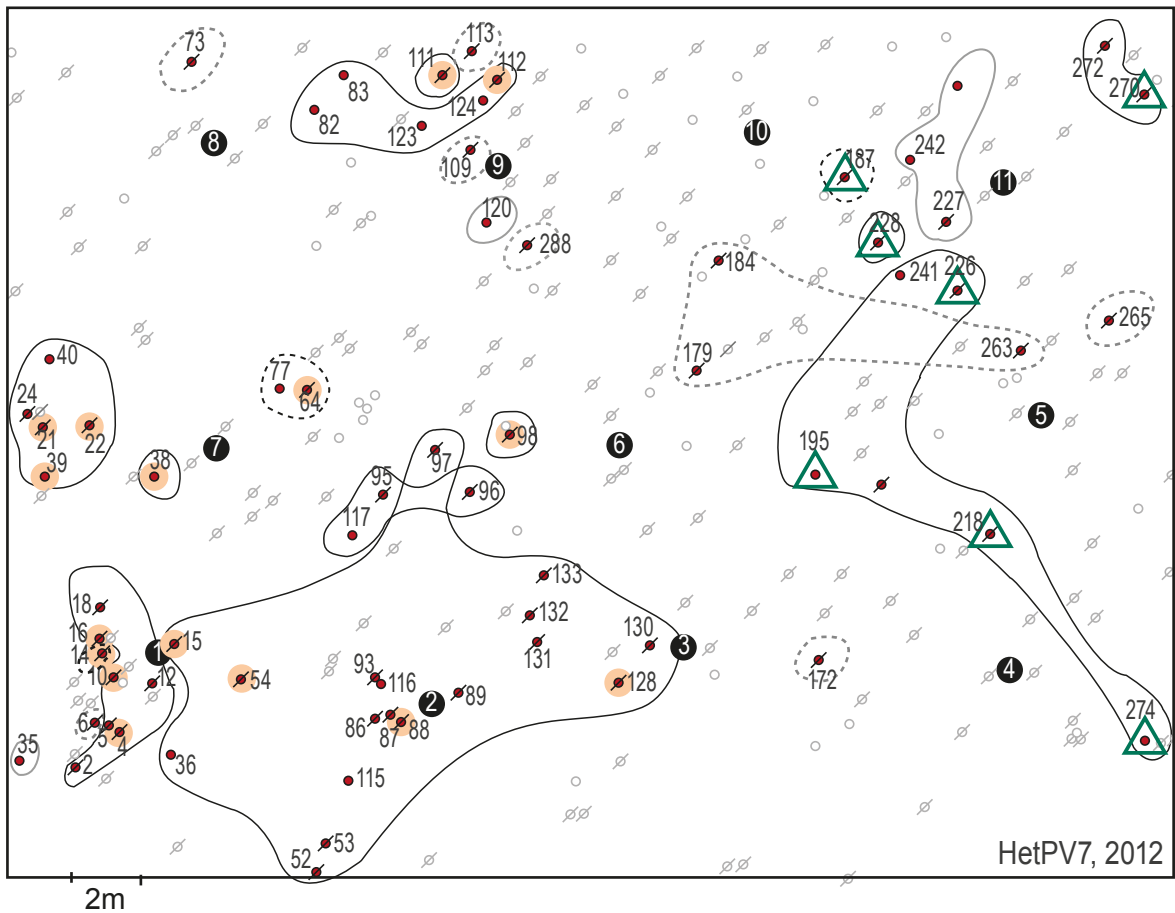

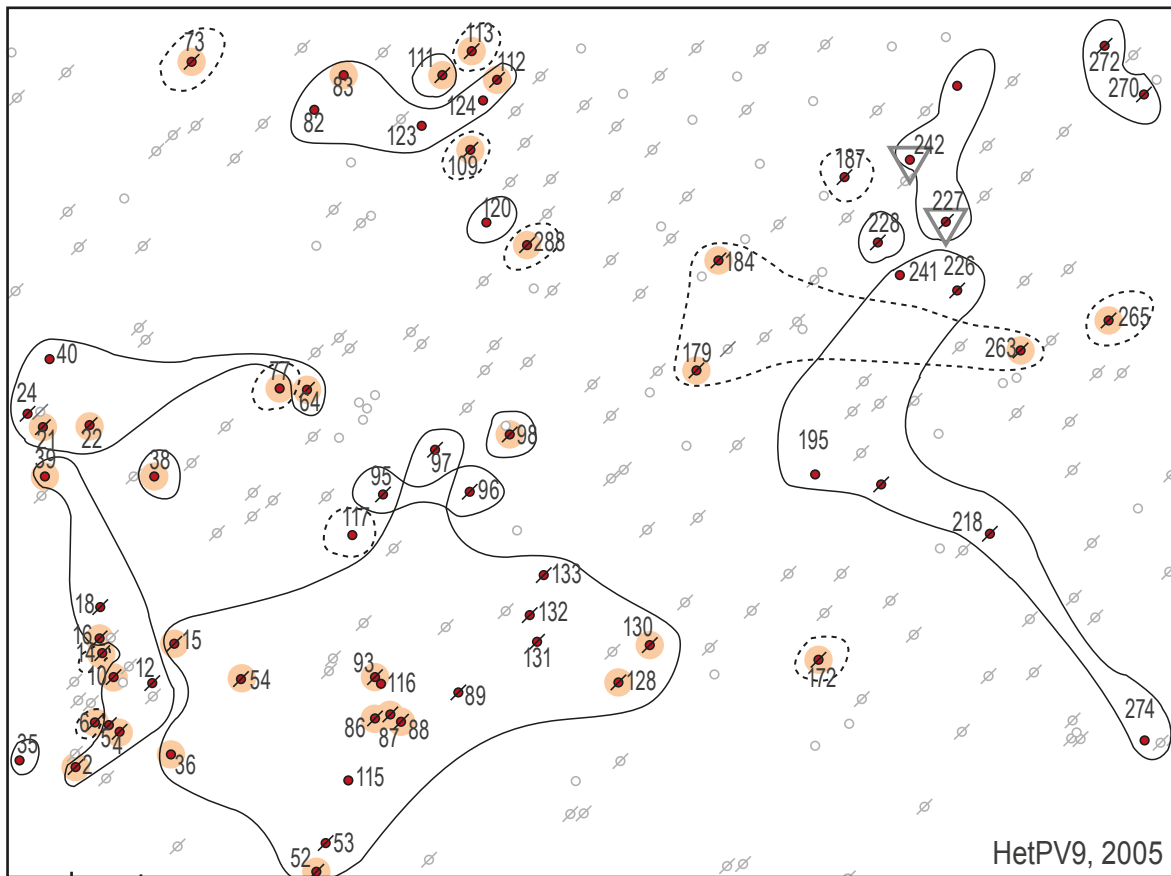

HetPV9, 2005

2m

Supplement: ismej2014145x3.pdf [file ismej2014145x3.pdf]
